# Supplementary material for: Self-assembled core–shell nanospheres and dendritic nanostructure of novel tetra-(3-phenyprop-2-allyloxy) phthalocyanine in different solvents
Source: Royal Society of Chemistry journal article supplement (doi:10.1039/c5ra07308a), 2015-01-01
Supplement: c5ra07308a1.pdf [file c5ra07308a1.pdf]

# **Self-Assembled Core-Shell Nanospheres and Dendritic Nanostructure of Novel Tetra-(3-phenyprop-2-allyloxy) phthalocyanine in Different Solvents**

Yinghui Bian, Jinshe Chen, Shaotang Xu, Lijun Zhu, Yulu Zhou, Yuzhi Xiang, and Daohong Xia\*

State Key Laboratory of Heavy Oil Processing, College of Chemical Engineering, China University of Petroleum, Qingdao 266580, China

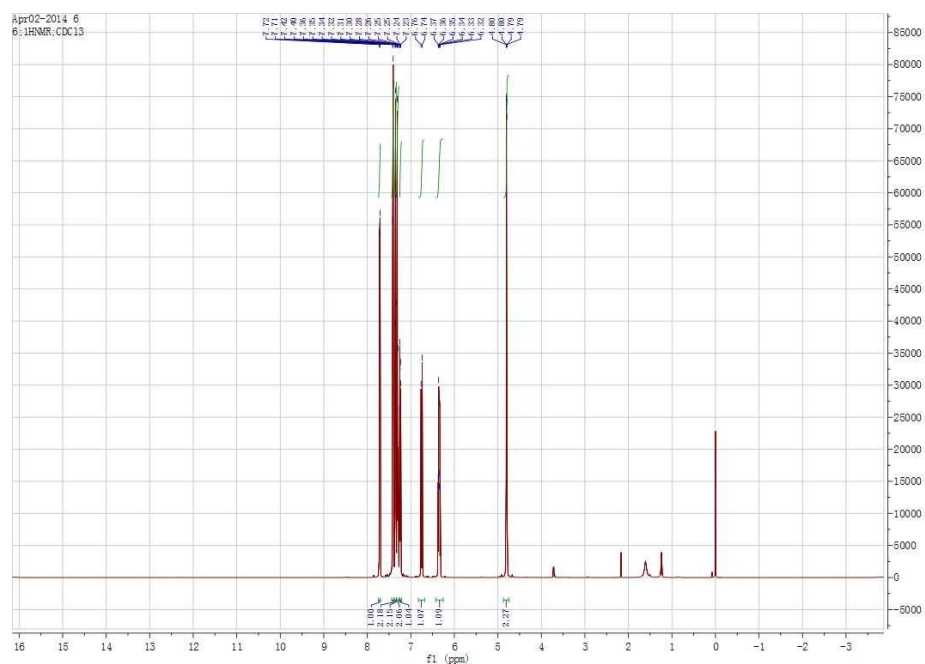

**Fig .S1**  $^1\text{H}$  NMR spectrum of compound 3

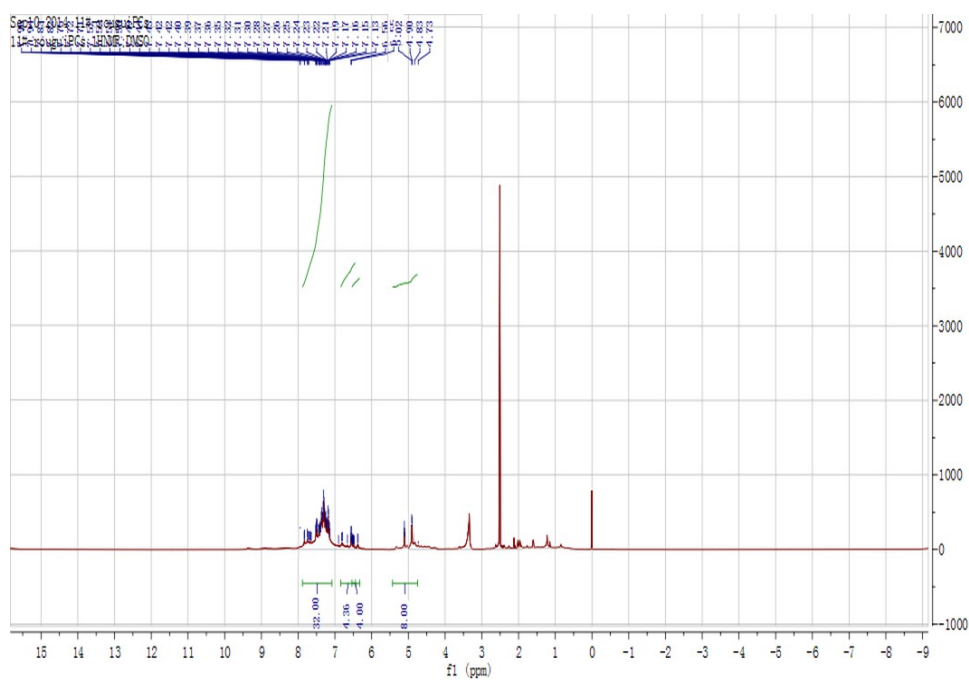

**Fig. S2**  $^1\text{H}$  NMR spectrum of compound 4

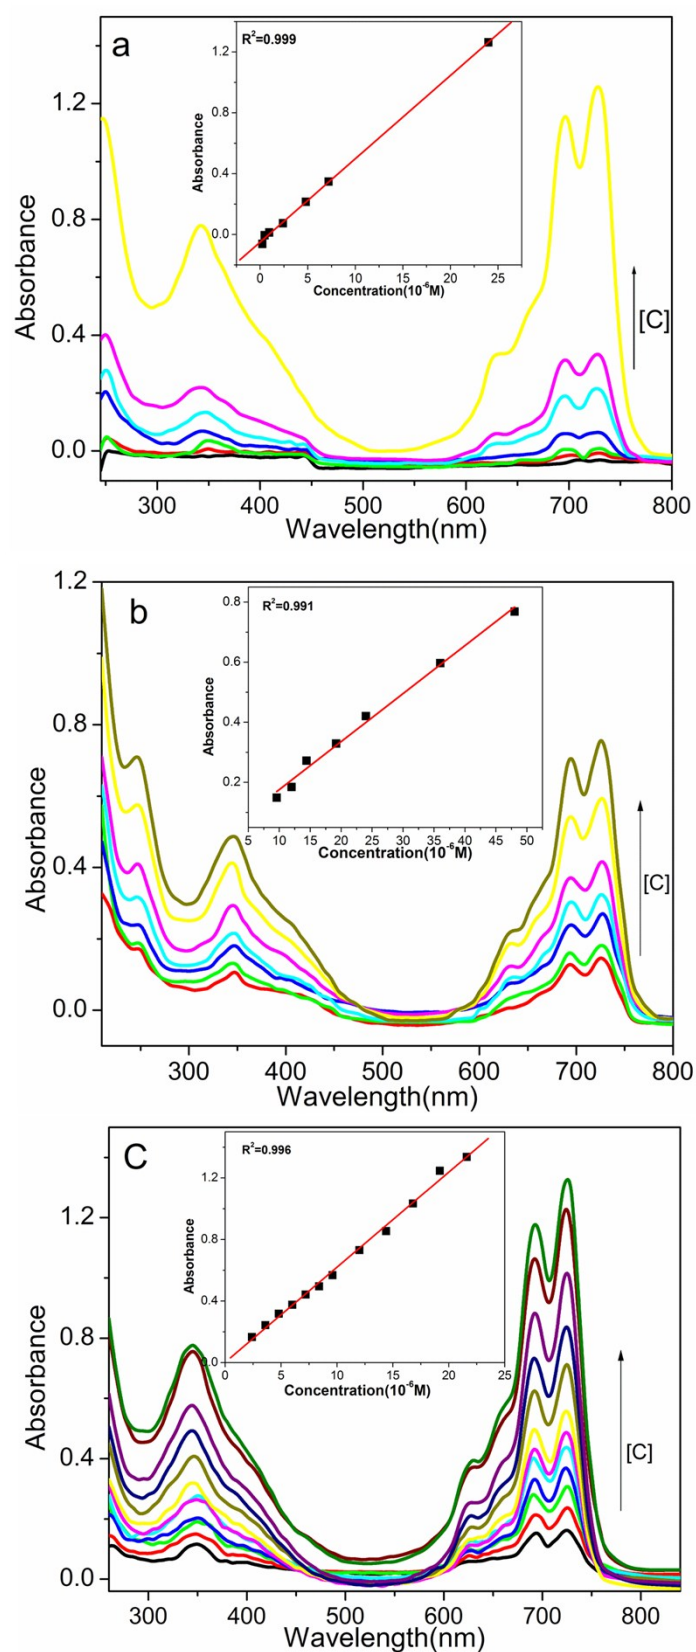

**Fig.S3** Absorption spectra changes of TPAO-Pc in dichloromethane (a), ethanol (b) and ethyl acetate (c) at different concentrations:  $2.4 \times 10^{-6}$  (A),  $3.6 \times 10^{-6}$  (B),  $4.8 \times 10^{-6}$  (C),  $6.0 \times 10^{-6}$  (D),  $7.2 \times 10^{-6}$  (E),  $8.4 \times 10^{-6}$  (F),  $9.6 \times 10^{-6}$  (G),  $12 \times 10^{-6}$  (H),  $14.4 \times 10^{-6}$  (I),  $16.8 \times 10^{-6}$  (J),  $19.2 \times 10^{-6}$  (K),  $21.6 \times 10^{-6}$  M (L). (Insets: Plot of absorbance versus concentration in Q-band.)

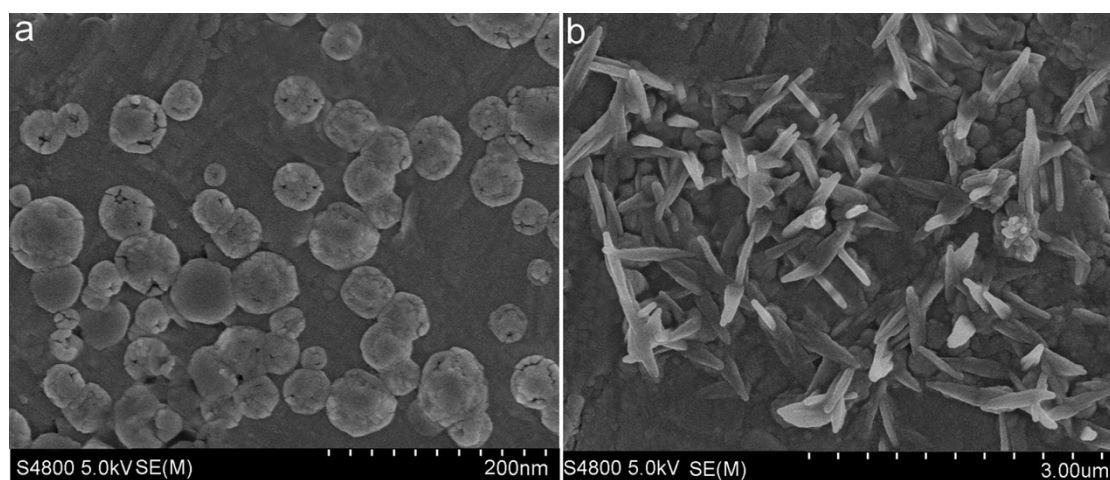

**Fig. S4** SEM images of the morphologies self-assembled from DMSO/water (a) and acetone/water (b) after 12 h.

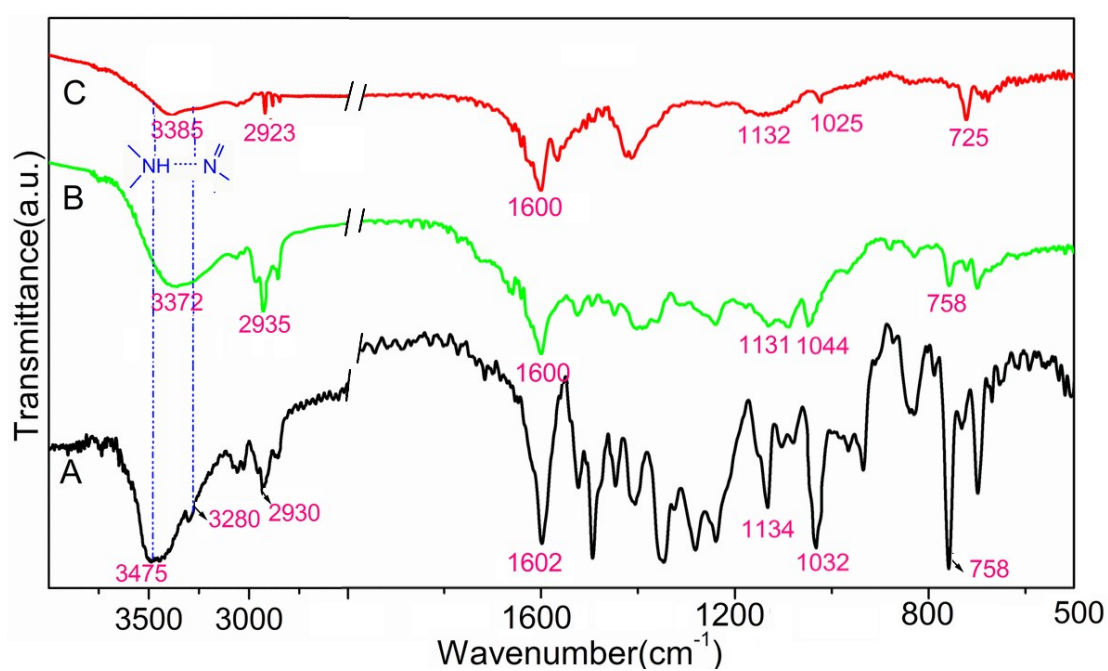

**Fig. S5** FT-IR spectra of TPAO-Pc (A), aggregates of TPAO-Pc with dendritic morphology formed in acetone/water (B) and core-shell nanospheres morphology formed in DMSO/water (C) in the region 500-2000  $\text{cm}^{-1}$  and 2500-4000  $\text{cm}^{-1}$  with  $2\text{cm}^{-1}$  resolution.
